# Supplementary material for: TiO2 nanoparticles vs. TiO2 nanowires as support in hydrogen peroxide direct synthesis: the influence of N and Au doping
Source: Royal Society of Chemistry journal article supplement (doi:10.1039/c6ra24357f), 2016-01-01
Supplement: c6ra24357f1.pdf [file c6ra24357f1.pdf]

# Supporting Information

## **TiO<sub>2</sub> nanoparticles vs TiO<sub>2</sub> nanowires as support in hydrogen peroxide direct synthesis: The influence of N and Au doping**

Nicola Gemo<sup>a\*</sup>, Federica Menegazzo<sup>b</sup>, Pierdomenico Biasi<sup>a,c,\*</sup>, Anjana Sarkar<sup>c</sup>, Ajaikumar Samikannu<sup>c</sup>, Dilip G. Raut<sup>c</sup>, Krisztián Kordás<sup>d</sup>, Anne-Riikka Rautio, Melinda Mohl<sup>d</sup>, Dan Boström<sup>e</sup>, Andrey Shchukarev<sup>c</sup>, Jyri-Pekka Mikkola<sup>a,c</sup>.

<sup>a</sup>Åbo Akademi University, Laboratory of Industrial Chemistry and Reaction Engineering, Process Chemistry Centre, Åbo Akademi University, Biskopsgatan 8, 20500 Turku/Åbo, Finland.

<sup>b</sup>Department of Molecular Sciences and Nanosystems, Ca' Foscari University Venice and INSTM-RU Ve, Via Torino 155, 30170 Venezia Mestre, Italy

<sup>c</sup>Umeå University, Department of Chemistry, Chemical-Biochemical Centre (KBC), Technical Chemistry, Umeå University, SE-90187 Umeå, Sweden.

<sup>d</sup>Faculty of Technology, Microelectronics and Materials Physics Laboratories, EMPART Research Group of Infotech Oulu, University of Oulu, FI-90014 Oulu, Finland.

<sup>e</sup>Department of Applied Physics and Electronics, Chemical-Biochemical Centre (KBC), Umeå University, SE-90187 Umeå, Sweden

\*Email: nicola.gemo@gmail.com (N.G.), bpierdom@abo.fi (P.B.)

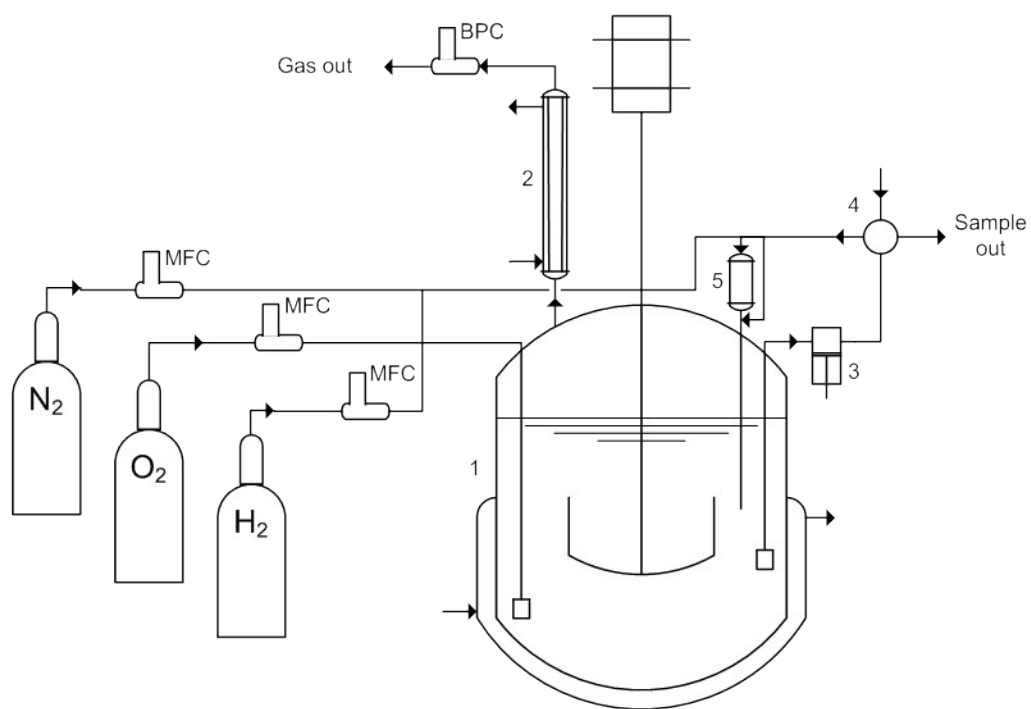

**Figure S1.** Schematics of the experimental apparatus: 1- reactor; 2 - condenser; 3 - high pressure pump; 4 - sampling valve; 5 - catalyst chamber; MFC - mass flow controller; BPC - back pressure controller.

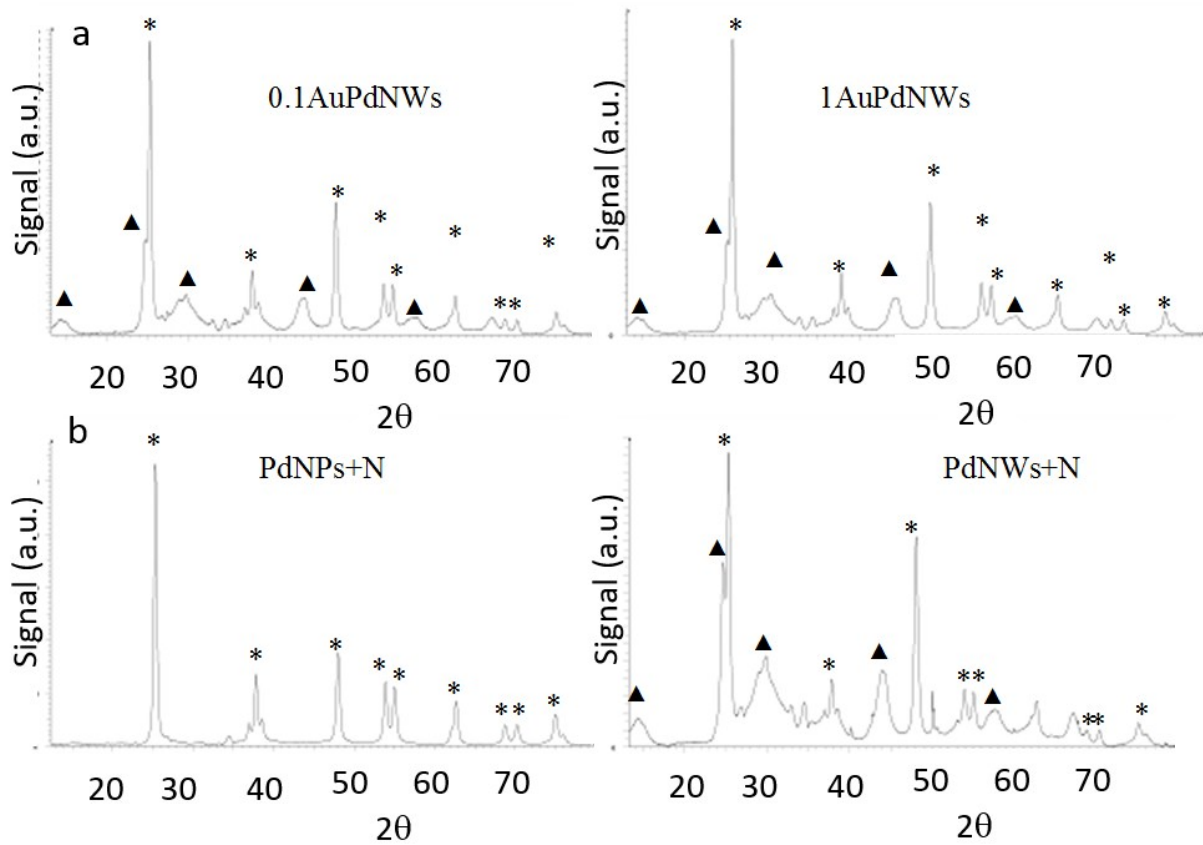

**Figure S2.** XRD patterns of bimetallic samples on TiO<sub>2</sub> nanowires (section a) and of N-doped samples (section b). (\* indicate anatase phase, while ▲ indicate beta-titania, space group C2/m).

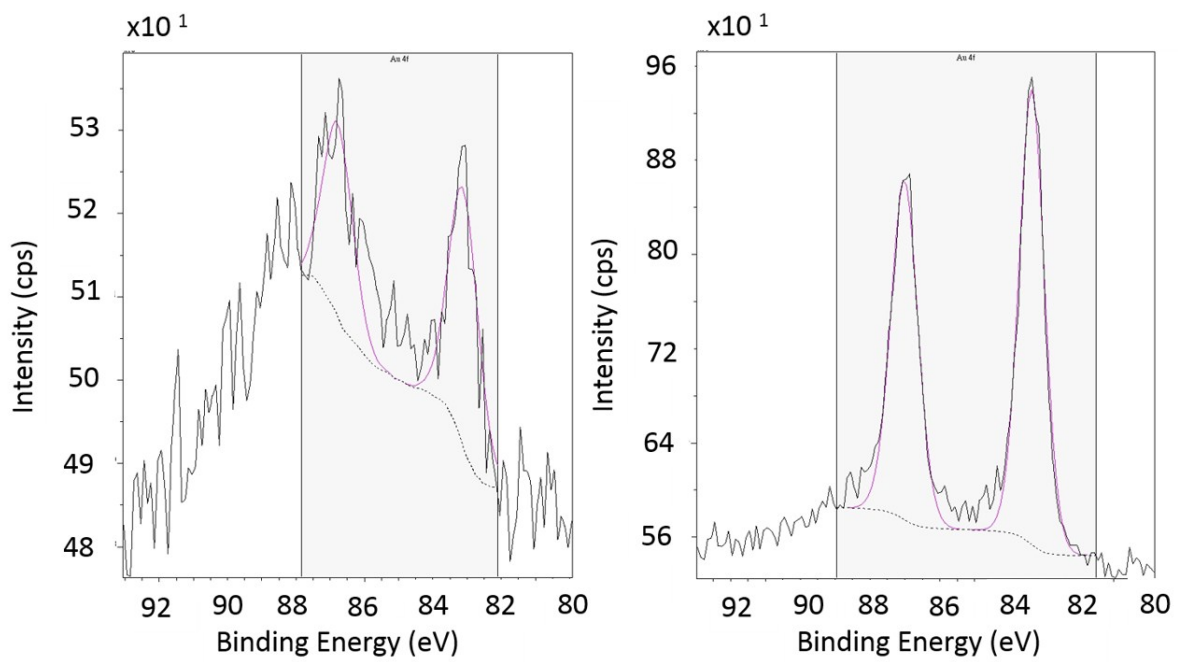

**Figure S3.** XPS Au4f spectra of 0.1AuPdNWs (left) and 1AuPdNWs (right).
